# Supplementary material for: A compound chimeric antigen receptor strategy for targeting multiple myeloma
Source: PubMed Central journal article supplement — Leukemia. 2017 Nov 10;32(2):402–12. doi: 10.1038/leu.2017.302 (PMC5808076; doi:10.1038/leu.2017.302), 2017-11-10

## Supplementary Figure 2

### Mice whole blood samples collected from BCMA and CS1 experimental groups

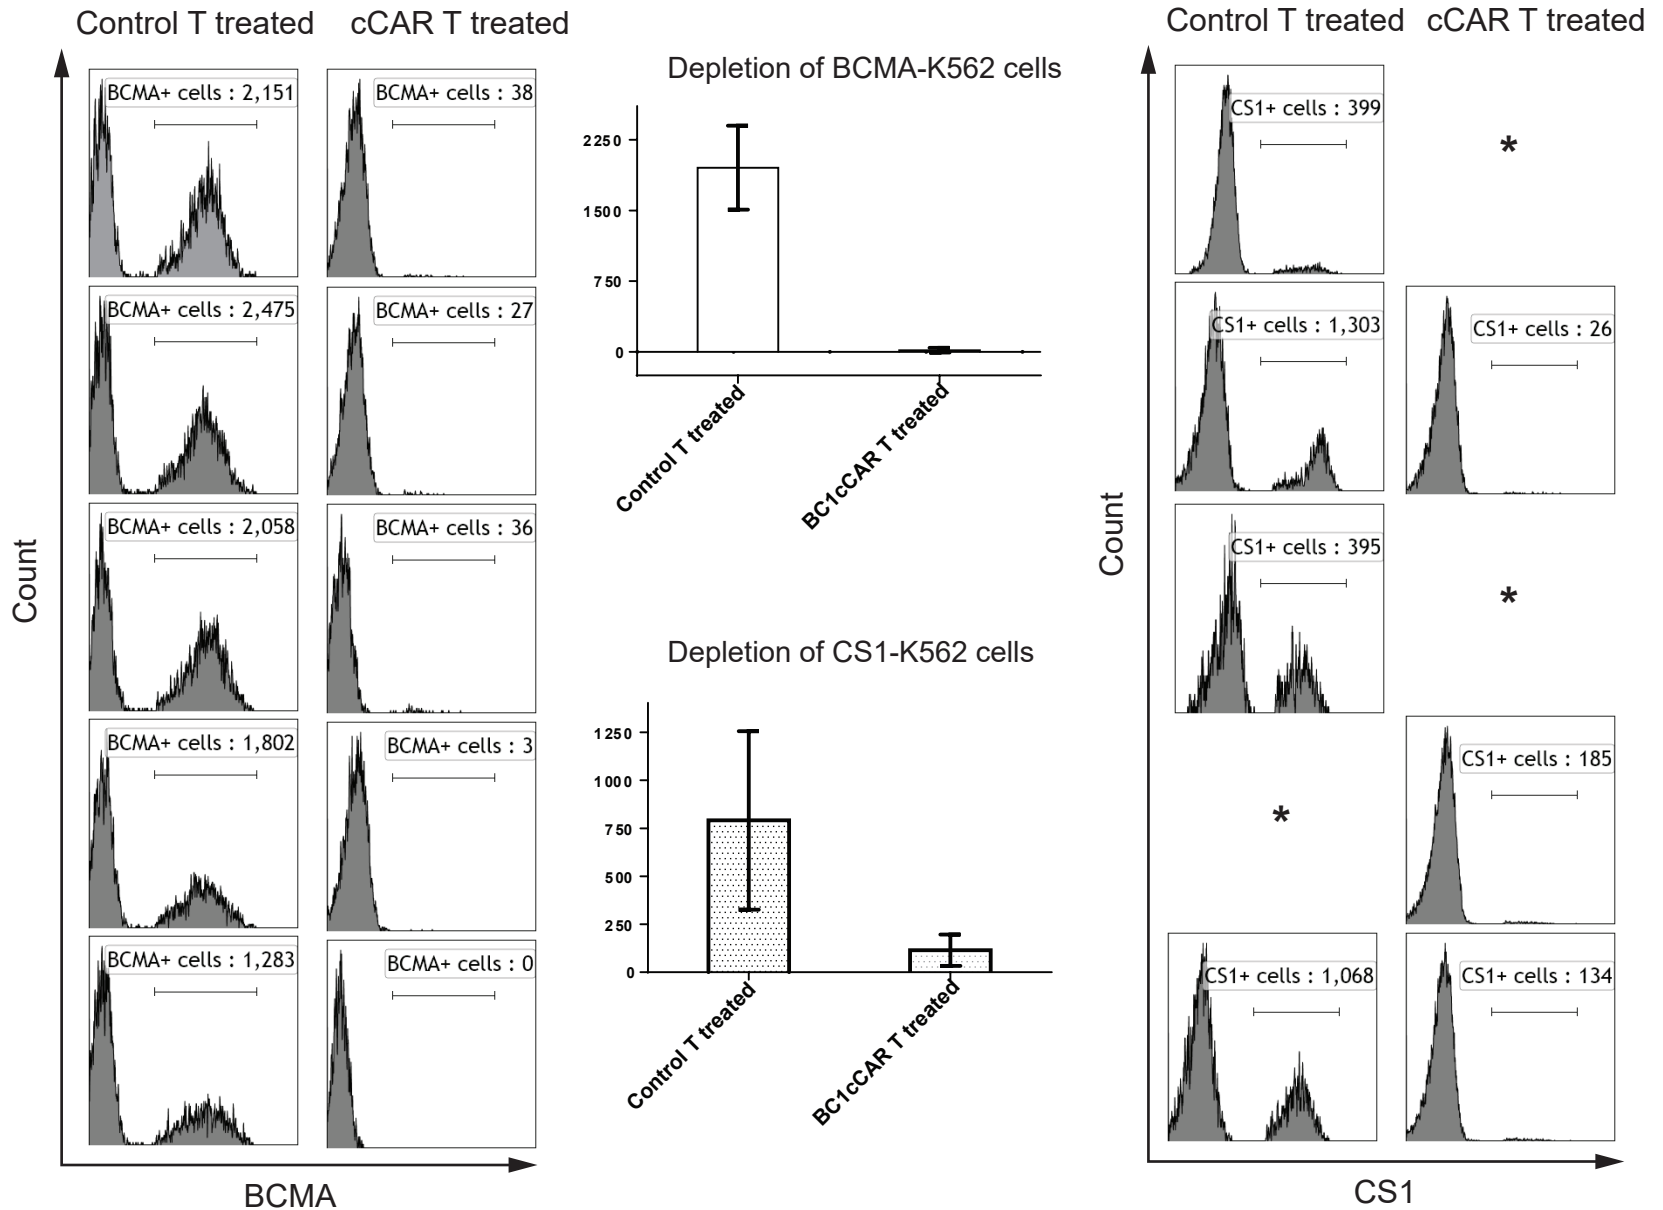

Supplement: leu2017302x5.pdf [file leu2017302x5.pdf]
